# Supplementary material
Source: publisher figshare collection journal article supplement (https://tandf.figshare.com/articles/dataset/_/7580174)
Supplement: Supplementary file 1 [file 1]

## 书面同意书

研究名称：基于镜像视觉错觉的面神经麻痹治疗疗效及机制研究

伦理批件号：KY2018-004

研究机构：复旦大学附属华山医院

本人同意在参与该实验研究过程中，授权实验研究人员拍摄本人照片、视频。此外，本人也同意研究方以任何形式无偿使用照片、视频，包括（不限于）：论文发表、学术活动或其他出版物等。

签名： 赖富贵

日期：2018 年 4 月 30 日

## 书面同意书

研究名称：基于镜像视觉错觉的面神经麻痹治疗疗效及机制研究

伦理批件号：KY2018-004

研究机构：复旦大学附属华山医院

本人同意在参与该实验研究过程中，授权实验研究人员拍摄本人照片、视频。此外，本人也同意研究方以任何形式无偿使用照片、视频，包括（不限于）：论文发表、学术活动或其他出版物等。

签名：

日期：2018 年 4 月 30 日

## 书面同意书

研究名称：基于镜像视觉错觉的面神经麻痹治疗疗效及机制研究

伦理批件号：KY2018-004

研究机构：复旦大学附属华山医院

本人同意在参与该实验研究过程中，授权实验研究人员拍摄本人照片、视频。此外，本人也同意研究方以任何形式无偿使用照片、视频，包括（不限于）：论文发表、学术活动或其他出版物等。

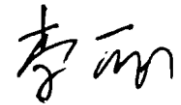A handwritten signature in black ink, appearing to read '李四' (Li Si).

签名：

日期：2018 年 4 月 30 日

## 书面同意书

研究名称：基于镜像视觉错觉的面神经麻痹治疗疗效及机制研究

伦理批件号：KY2018-004

研究机构：复旦大学附属华山医院

本人同意在参与该实验研究过程中，授权实验研究人员拍摄本人照片、视频。此外，本人也同意研究方以任何形式无偿使用照片、视频，包括（不限于）：论文发表、学术活动或其他出版物等。

签名：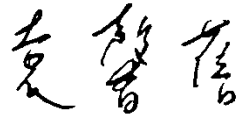

日期：2018 年 4 月 15 日

## **Photo/Video Release Form**

Research Title: The Effect and Underlying Mechanism of Mirror Visual Feedback Based Therapy in Patients with Bell's Palsy

Ethics: KY2018-004

Research Institute: Huashan Hospital Fudan University

I agree to grant to researchers permission to record on photography film and/or video, pictures of my participation. I further agree that any or all of the material photographed may be used, in any form, as part of any future publications, or other printed materials used without payment of fees, or other compensation.

Signature:

Date:
